# Supplementary material
Source: PubMed Central journal article supplement (PMC5676240)

# Power to detect an association through GWAS

for 177 genotypes with 3 replicates and  $H^2=0.8$

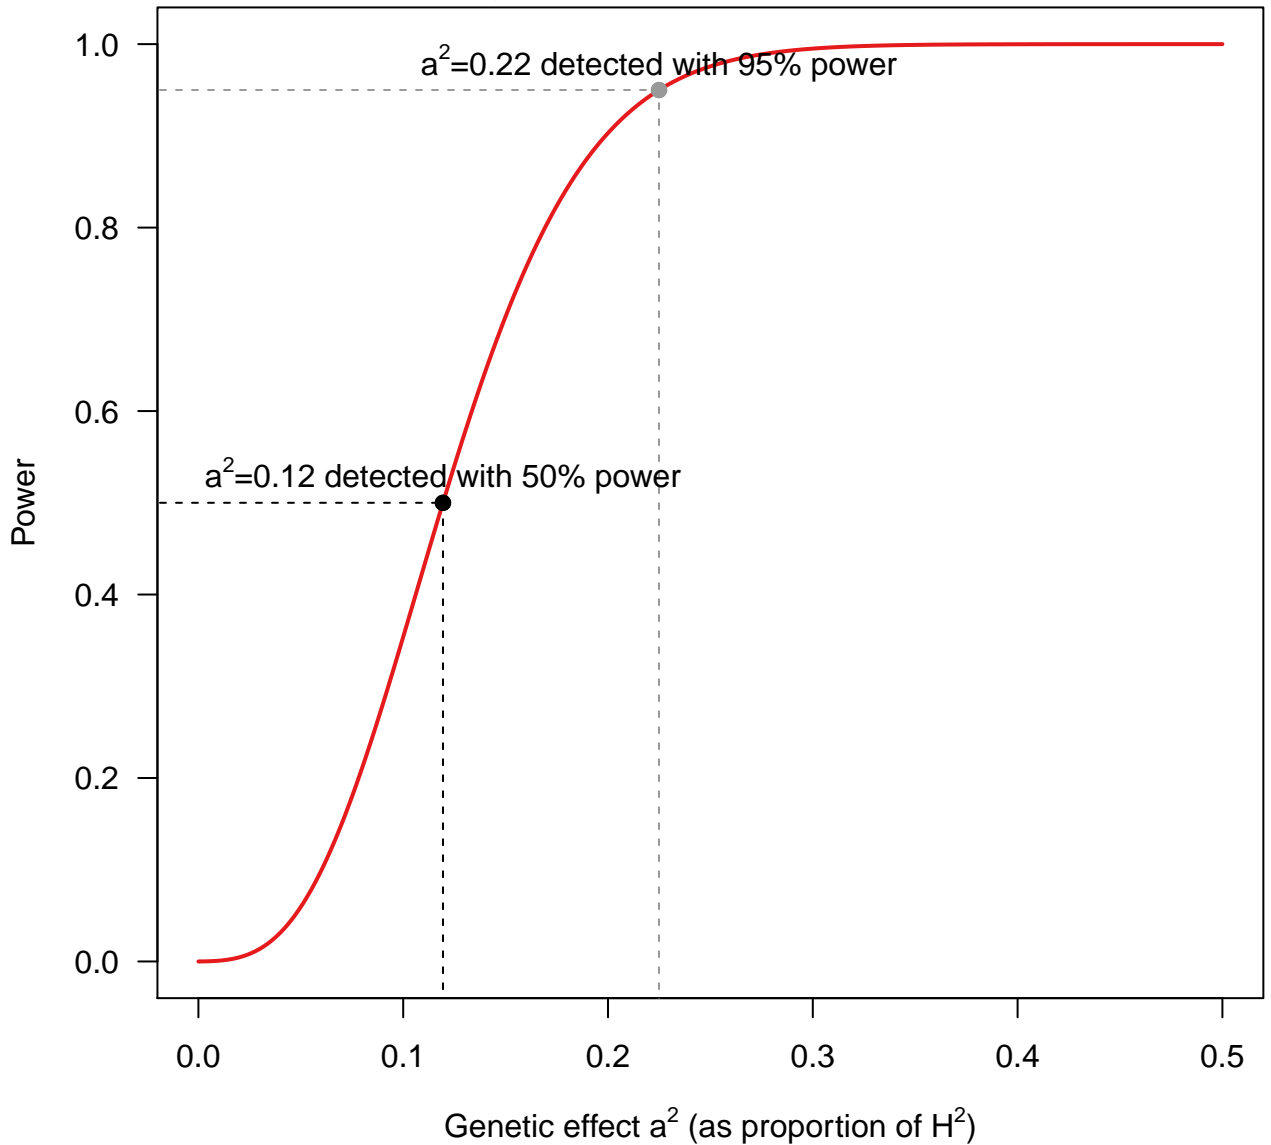

Supplement: 1181FileS4.pdf [file 1181FileS4.pdf]
